# Supplementary material for: Selected imprinting of INS in the marsupial
Source: PubMed Central journal article supplement (PMC3502105; doi:10.1186/1756-8935-5-14), 2012-08-28
Supplement: 1756-8935-5-14-S3.pdf [file 1756-8935-5-14-S3.pdf]

Additional file 3 - **Primers used in this study**

Selected imprinting of *INS* in the marsupial

Jessica M Stringer, Shunsuke Suzuki, Andrew J Pask, Geoff Shaw, Marilyn B Renfree

| Gene           | Primer                    | Primer sequence (5' to 3')                                    | Reference |
|----------------|---------------------------|---------------------------------------------------------------|-----------|
| <i>INS</i>     | cDNA exon2 Fw             | TGACATGGCTCCCTGGTTGGC                                         | a         |
|                | cDNA exon2/3 Rv           | TCCGGCCTCACCCAACAGTG                                          |           |
|                | cSeq RV                   | GGCGTGCTTTGGGAGTATAG                                          | a         |
|                | gDNA Fw                   | GGACAGGAACCTGAGACTGG                                          | [57]      |
|                | gDNA Rv                   | CTTGACATGGCTCCCTGG                                            |           |
|                | gSeq RV                   | ACAGTGGCTGCTCAGCATC                                           | a         |
|                | GSP1                      | ( <i>INS</i> cSeq RV)                                         | a         |
|                | GSP2                      | CCCCACACACCAGGTACAA                                           |           |
|                | QPCR Fw                   | GCTGAGCAGCCACTGTTGGG                                          | a         |
|                | QPCR Rv                   | TGGCCGCTAGTTGCAGTAAGTC                                        |           |
|                | Probe                     | CAGTATCTGTTCCCTTTACCAGCTGGA                                   |           |
|                | gDNA TSS Fw               | GGTACCTCAGCTGTTATTGAGGAG                                      | a         |
|                | gDNA TSS Rv               | AAGACATGGATATAGAGGGGGCATA                                     |           |
|                | B/S Fw                    | GGTATTTTAGTTGTTATTGAGGAGAG                                    | a         |
| B/S Rv         | ACCACCCATAAATACCTAACTTCTC |                                                               |           |
| <i>TH-INS</i>  | cDNA exon1 Fw             | GCTCCATCTTCTTTTCTCACCTGTCTCT<br>( <i>INS</i> cDNA exon2/3 Rv) | a         |
|                | cDNA Fw:                  | TTCGTGTCAGAGAGCTTTAGCGATG<br>( <i>INS</i> cDNA exon2/3 Rv)    | a         |
|                | gDNA CGI Fw               | AAGAGGTTTGGTGACTTCCTGTCCT                                     | a         |
|                | gDNA CGI Rv               | TTAGCTCATAGCGTTGAGAGCATGG                                     |           |
|                | gDNA TSS Fw               | CCTCACCTGGACTCTGGTCTGACT                                      | a         |
|                | gDNA TSS Rv               | CCAGGCCAACAGTGAGGGTTC                                         |           |
|                | B/S TSS Fw                | TTTTTTGTTTGAGGAGTTAGAGATT                                     | a         |
|                | B/S TSS Rv                | ATATCCATACCAAACCTACCAAAC                                      |           |
|                | B/S CGI Fw                | GGTTTTTGTGTTTTTTGTGTGTTTT                                     | a         |
|                | B/S CGI Rv                | TAAACTCATCCTAAACCCCTTACA                                      |           |
| <i>IGF2</i>    | Fw                        | AAGTAACCTGGGTTCCCTGCC                                         | [68]      |
|                | Rv                        | CTCTTCTGCCGAAGGATGAC                                          | a         |
|                | Seq Fw                    | GAGAGGGCCTCGCTACCAAC                                          | a         |
|                | QPCR Fw                   | TGGGTTTCCCAATGAAGAAG                                          | a         |
|                | QPCR Rv                   | GATTCAGGCGACGACTCAC                                           |           |
| <i>B-ACTIN</i> | Fw                        | TTGCTGACAGGATGCAGAAG                                          |           |
|                | Rv                        | AAAGCCATGCCAATCTCATC                                          |           |
| <i>18S</i>     | Fw                        | CGGCTACCACATCCAAGGAA                                          |           |
|                | Rv                        | GCTGGAATTACCGCGGCT                                            |           |
|                | Probe                     | TGCTGGCACCAGACTTGCCCTC                                        |           |
| <i>GAPDH</i>   | Fw                        | CCTACTCCCAATGTATCTGTTGTGG                                     |           |
|                | Rv                        | GGTGGAACTCCTTTTTTGACTGG                                       |           |

Primers were designed for this study<sup>a</sup> using Primer3 (v. 0.4.0) [84] or derived from the references shown.
